# Supplementary material for: Centrin-2 (Cetn2) mediated regulation of FGF/FGFR gene expression in Xenopus
Source: PubMed Central journal article supplement (PMC4650658; doi:10.1038/srep10283), 2015-05-27

**Supplemental Figures for:**

**Centrin-2 (Cetn2) mediated regulation of FGF/FGFR gene expression in *Xenopus***

Jianli Shi, Ying Zhao, Tyson Vonderfecht, Mark Winey & Michael W. Klymkowsky\*

**Supplemental figure 1 A:** In both *X. laevis* and *X. tropicalis*, the structure of the gene originally called *Centrin/Centrin-1* is more like that of mouse and human *Cetn2s*; we refer to these *Xenopus* genes as *Cetn2*. There does not appear to be a *Cetn1*-like gene in the *Xenopus* genome. **B.** A comparison of the *X. laevis* *Cetn2* protein to human *Cetn1* and *Cetn2* proteins.

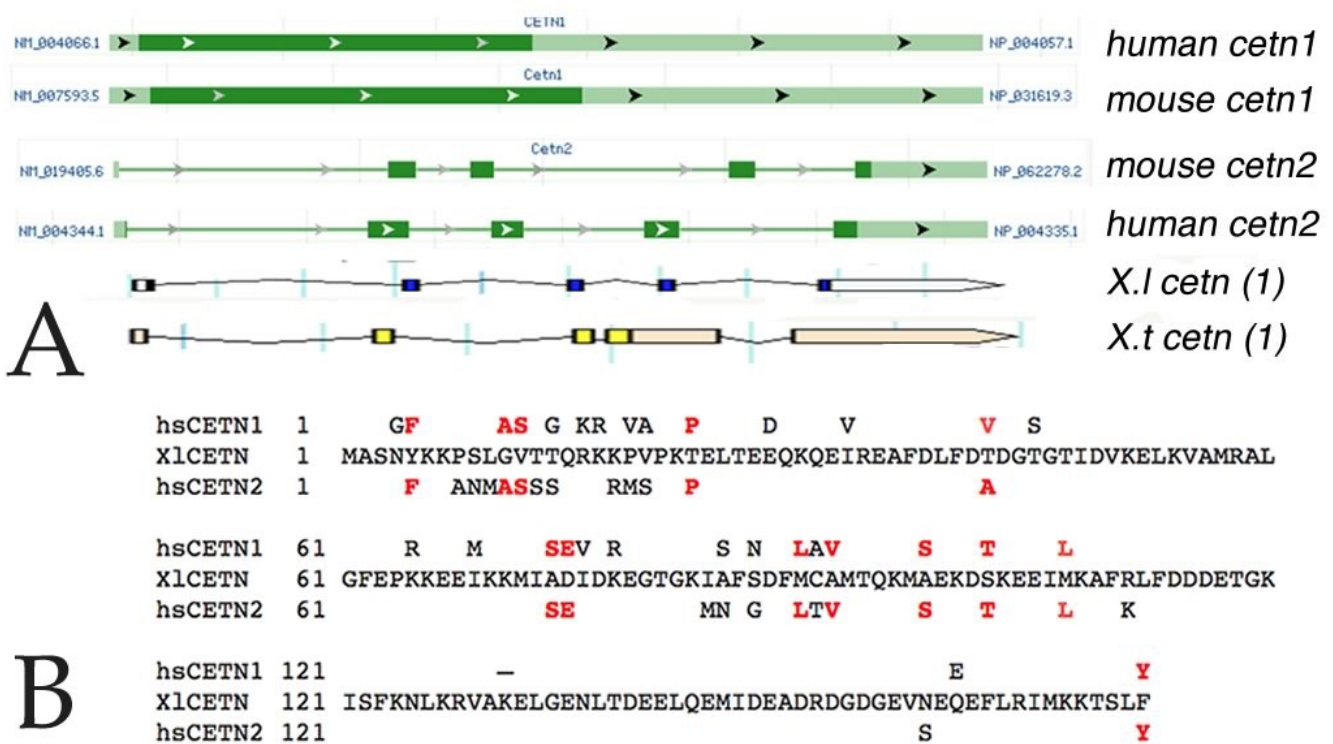

**Supplemental Figures for:**

**Centrin-2 (Cetn2) mediated regulation of FGF/FGFR gene expression in *Xenopus***

Jianli Shi, Ying Zhao, Tyson Vonderfecht, Mark Winey & Michael W. Klymkowsky\*

**Supplemental figure 2: A.** The morpholinos directed against the three *X. laevis* Cetns that are the focus of our studies are shown together with their target sequences. Cetn2 corresponds to the *Cetn2a* RNA; Cetn3 corresponds to the *Cetn3l* RNA. Not shown are the mismatches between the Cetn3 morpholino and the *Cetn3s* RNA (15 mismatched out of 25) and the mismatches between the Cetn2 MO2 morpholino and the *Cetn3s* RNA (the terminal 7 bases mismatched out of 25).

```

                                H.sapiens CETN2 in pCS2
                                ggaattcATGGCCTCCAACCTTAAG
                                IXXXXXXIIIIIXIIIIIXXIII 10 mismatches
                                CETN2 MO1 GTGTGATATGGCTTCTAACTACAAG
CETN2                                IIIIIIIIIIIIIIIIIIIIIIIIIIIIIIIII
gcgaggtcgaaggttggtgtgtgcagtgatATGGCTTCTAACTACAAGAAACCAT (mRNA 2665nt)
IIIIIIIIIIIIIIIIIIIIIIIIIIIIIIIIIIIIIIIIIIIIIIIIIIIIIIIIIIIIIIIIIIIIII
GCGAGGTCGAAGGTTGGTGTGTGCA        ATGGCCTCTGTTCTGCGTAAACCTG 13 mismatches
CETN1 MO2                            CETN4 MO

CETN2
gcgaggtcgaaggttggtgtgtgcagtgatATGGCTTCTAACTACAAGAAACCAT (mRNA 2665nt)
IIIIIIIIIIIIIIIIIIIIIIIIIIIIIIIIIIIIIIIIIIIIIIIIIIIIIIIIIIIIIIIIIIIIII
ATGAGCCTGGCTGTGAGGACTGATG CETN3 MO

CETN2 MO1
GTGTGATATGGCTTCTAACTACAAG
XXIXIIXIIIIIXXXXXXXXXXXXXXIXI 17 mismatches
cggagagATGAGCCTGGCTGTGAGGACTGATG CETN3

                                ATGAGCCTGGCTGTGAGGACTGATG CETN3 MO
                                IIIIIIIIIIIIIIIIIIIIIIIIIIIIIIIII
cggagagATGAGCCTGGCTGTGAGGACTGATG CETN3 (mRNA 799nt)
IIIXIXXXIXIXIIXIXIXXXXII 13 mismatches
ATGGCCTCTGTTCTGCGTAAACCTG
CETN4 MO
```

**Supplemental Figures for:**

**Centrin-2 (Cetn2) mediated regulation of FGF/FGFR gene expression in *Xenopus***

Jianli Shi, Ying Zhao, Tyson Vonderfecht, Mark Winey & Michael W. Klymkowsky\*

**Supplemental Figure 3:** Both blastomeres of two-cell embryos were injected with either control morpholino (not shown), Cetn2 MO1 (**B**), Cetn2 MO2 (**C**), Cetn3 MO (**D**), or Cetn4 MO (**E**)(20 ngs/embryo total injected), and compared with uninjected embryos (**A**). The embryos were fixed at stage 39-40. To examine the roles of Cetns in ciliogenesis, both blastomeres of two cell stage embryos were injected with either control morpholino (**F**), Cetn2 MO1 (**G**), Cetn3 MO (**H**), Cetn2MO1 and Cetn4 MO (**I**), or Cetn2, 3, 4 MOs (**J**)(20ng/embryo). Ectodermal explants were isolated at stage 9 and fixed at stage 18. Immunofluorescence staining was performed with anti-XICetn and anti-AAT antibodies to visualize ciliated cells. Confocal images were taken at 40X magnification. The scale bar in part J marks 20  $\mu\text{m}$  for parts F-J. The results indicate the general trends, but a more quantitative analysis using semi-automated confocal microscopy based quantitation (as described in Shi et al., 2014) is planned.

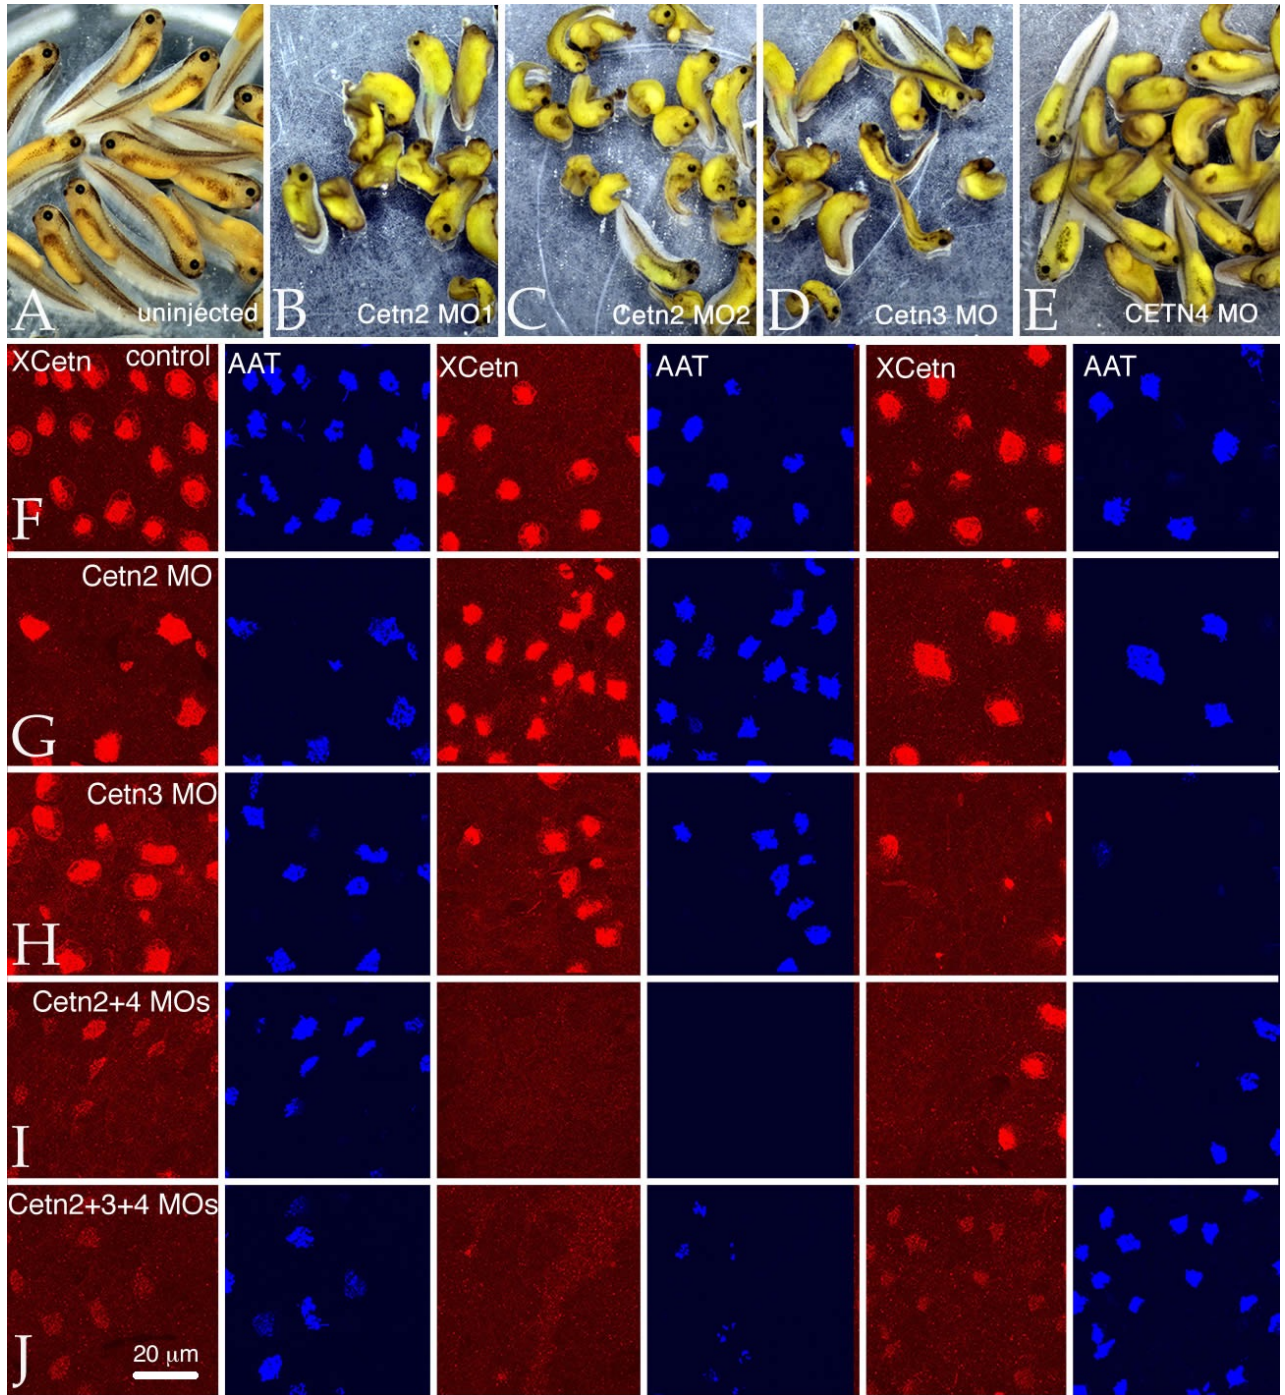

supplemental figure 3

**Supplemental Figures for:**

**Centrin-2 (Cetn2) mediated regulation of FGF/FGFR gene expression in *Xenopus***

Jianli Shi, Ying Zhao, Tyson Vonderfecht, Mark Winey & Michael W. Klymkowsky\*

**Supplemental figure 4:** To characterize the intracellular localization of Cetn4-GFP, both blastomeres of two cell embryos were injected with Cetn4-GFP RNA (200 pg/embryo) Ectodermal explants were isolated at stage 9 and fixed at stage 18. Immunofluorescence staining was performed with anti-GFP (**A,D**) and anti-AAT (**B,E**) antibodies to visualize ciliated cells (parts **C** and **F** are overlap images). Confocal images were taken at 40X magnification for parts **A-C** and at 100X for parts **D-I**. Scale bar in part **A** marks 10  $\mu\text{m}$  for parts **A-C**, while scale bar in part **D** marks 5  $\mu\text{m}$  for parts **D-F**.

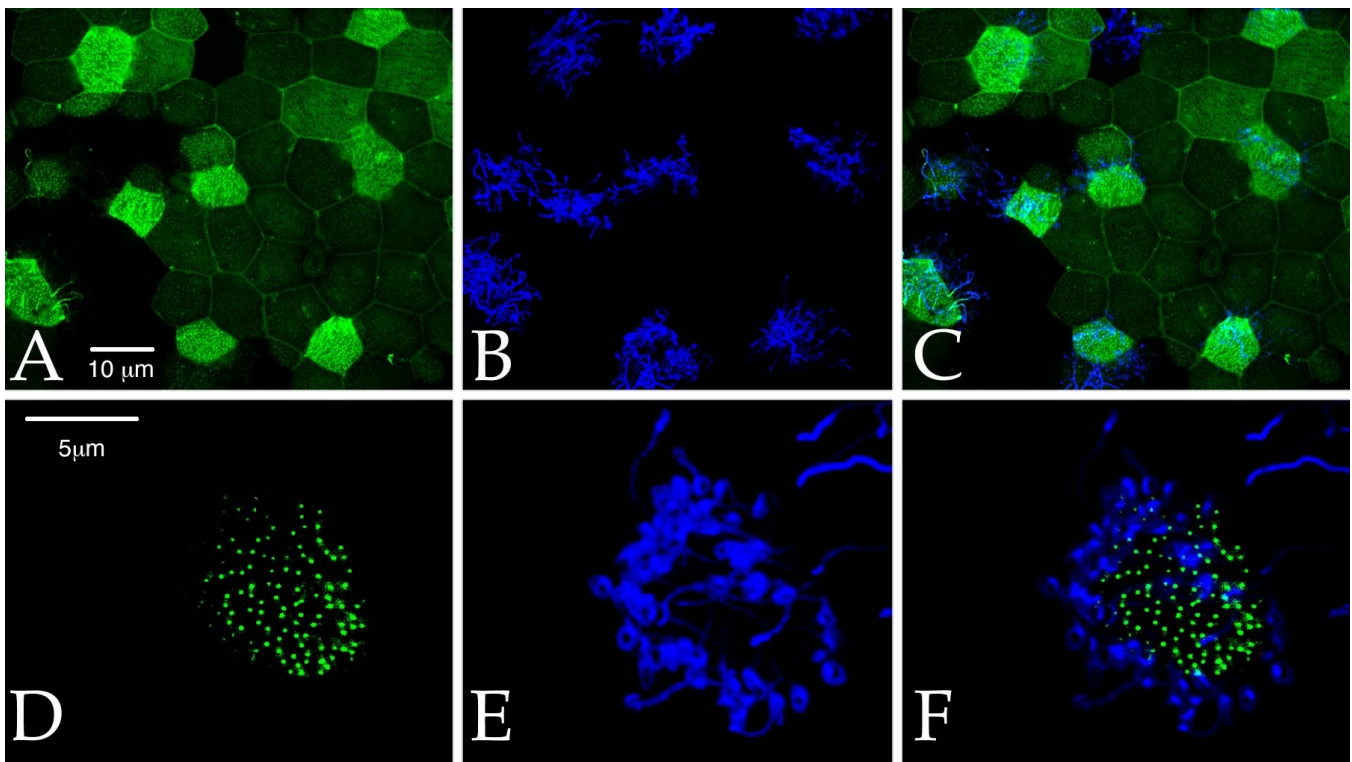

Supplement: srep10283-s1.pdf [file srep10283-s1.pdf]
